# Supplementary material for: Combining paratransgenesis with SIT: impact of ionizing radiation on the DNA copy number of Sodalis glossinidius in tsetse flies
Source: PubMed Central journal article supplement (PMC6251162; doi:10.1186/s12866-018-1283-8), 2018-11-23

**A**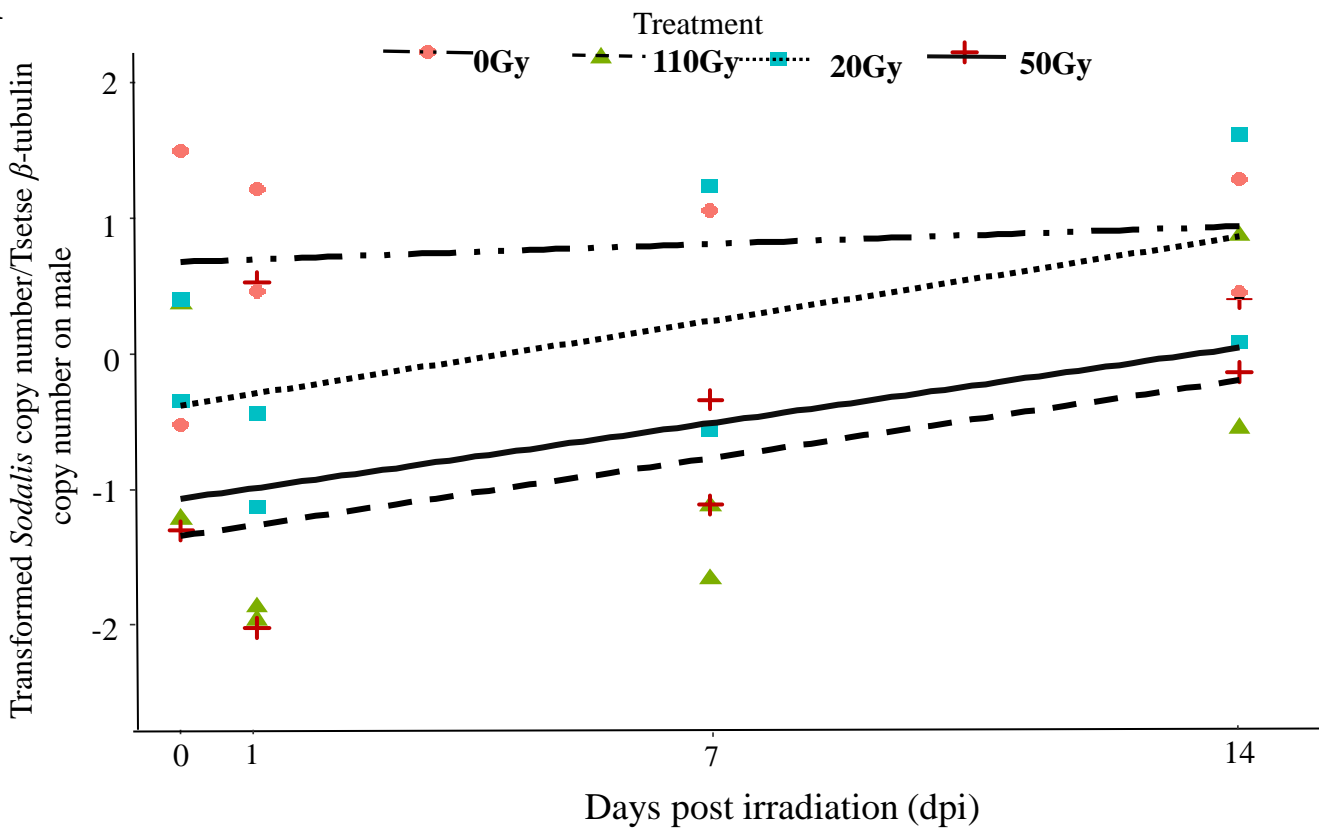**B**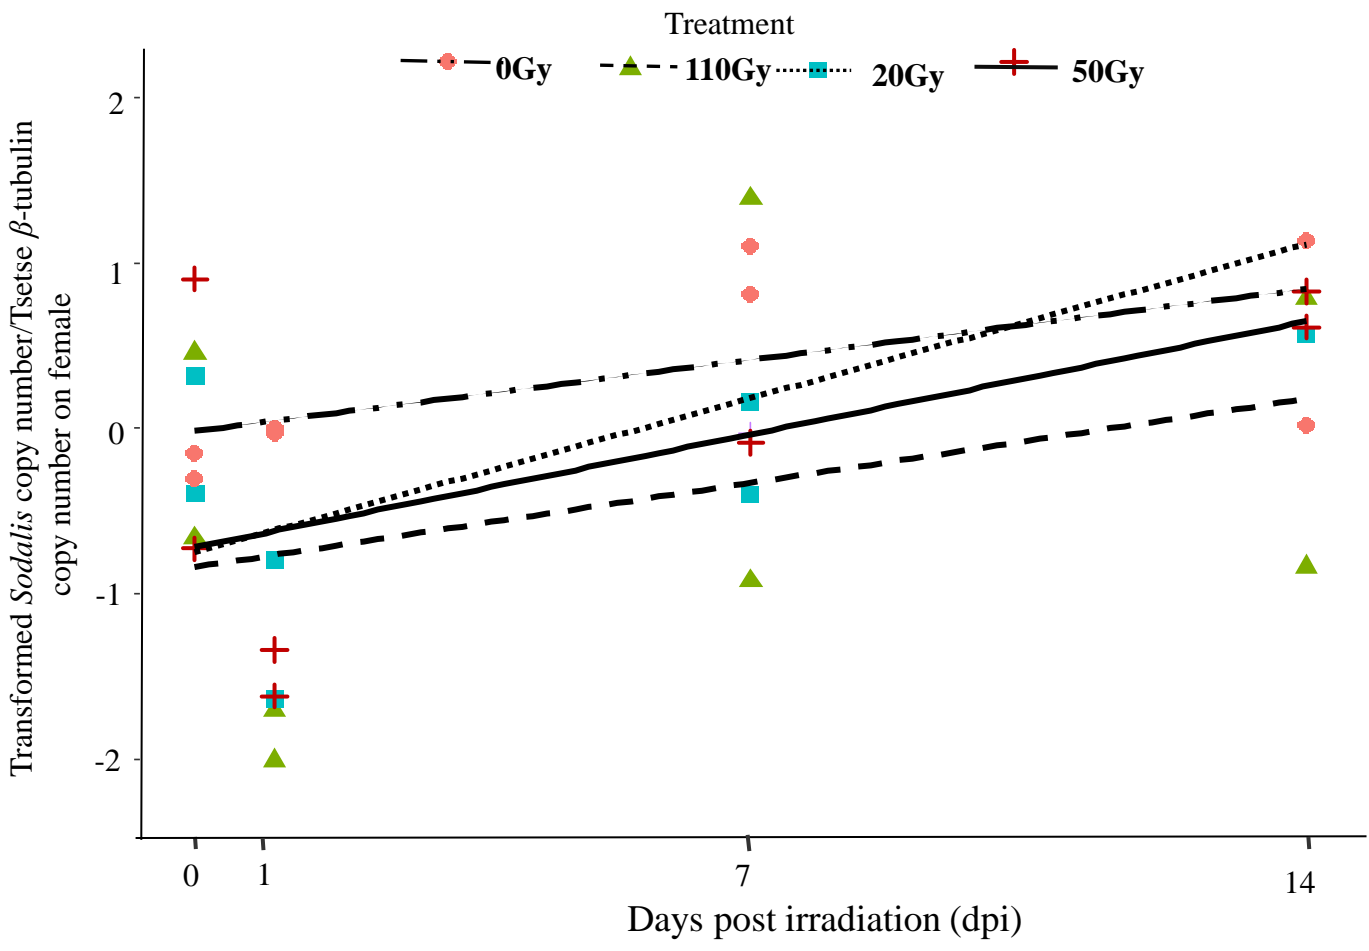

Supplement: 12866_2018_1283_MOESM5_ESM.pdf [file 12866_2018_1283_MOESM5_ESM.pdf]
